# Supplementary material for: Generation of Monoclonal Antibodies against Immunoglobulin Proteins of the Domestic Ferret (Mustela putorius furo)
Source: Hindawi journal article supplement (doi:10.1155/2017/5874572), 2017-02-14
Supplement: f1 [file 5874572.f1.pdf]

## Supplementary Materials:

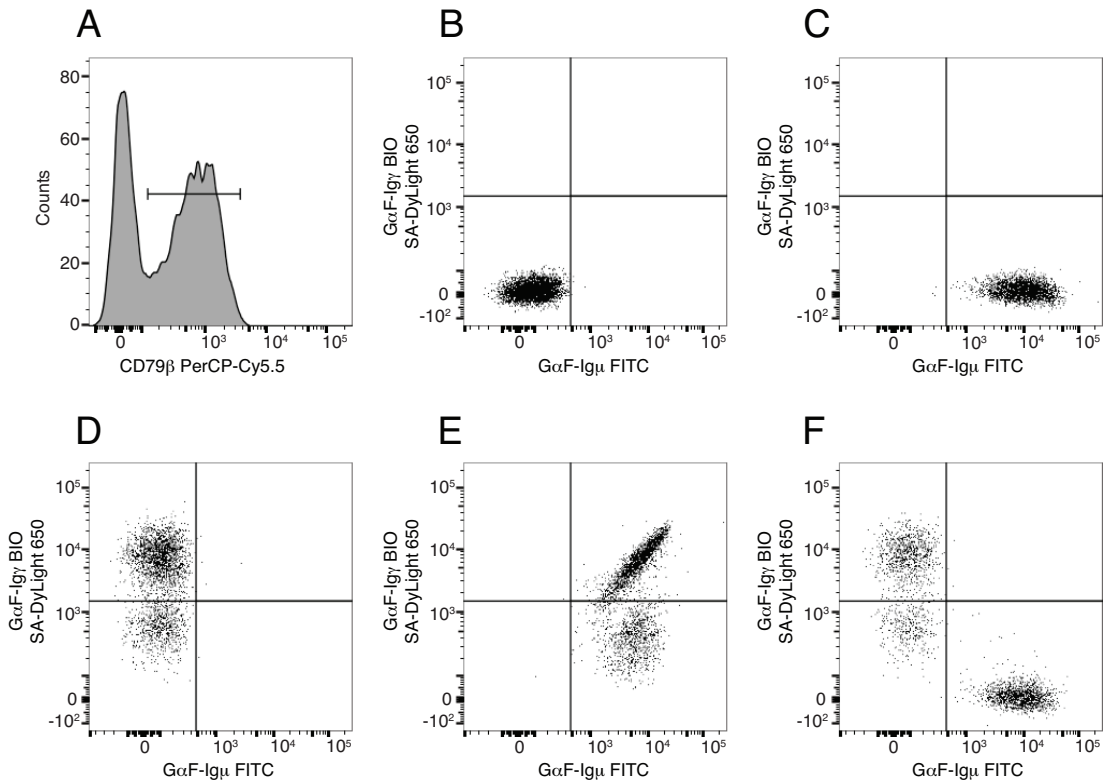

**Supplementary Figure 1.** Commercially available anti-ferret immunoglobulin reagents are not heavy chain specific (A) Ferret PBMC were surface stained with anti-CD79 $\beta$  to identify B cells and positive cells were gated as shown. (B) Fluorescence of CD79 $\beta$ + ferret B cells in the absence of staining with FITC conjugated goat anti-ferret IgM (G $\alpha$ F-Ig $\mu$  FITC) (Sigma, Cat #SAB3700807) or biotinylated goat anti-ferret IgG (G $\alpha$ F-Ig $\gamma$  BIO) (Sigma, Cat #SAB3700796) followed by secondary staining with DyLight 650 conjugated streptavidin (SA-DyLight 650) (ThermoFisher, Cat #84547). (C) Fluorescence of ferret B cells stained with G $\alpha$ F-Ig $\mu$  FITC. (D) Fluorescence of ferret B cells stained with G $\alpha$ F-Ig $\gamma$  BIO followed by secondary staining with SA-DyLight 650. (E) Double staining of ferret B cells with G $\alpha$ F-Ig $\mu$  FITC and G $\alpha$ F-Ig $\gamma$  BIO reagents. (F) Mixture (1:1) of cells stained identically to panels C and D. The presented data were generated using PBMC from a single ferret, and are representative of more than three independent experiments.

**A**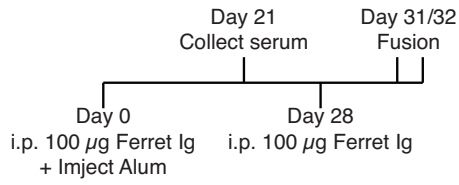**B**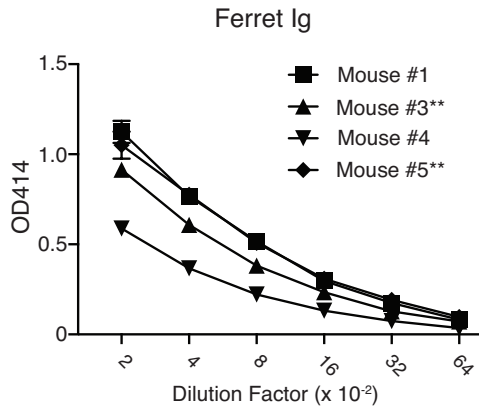**C**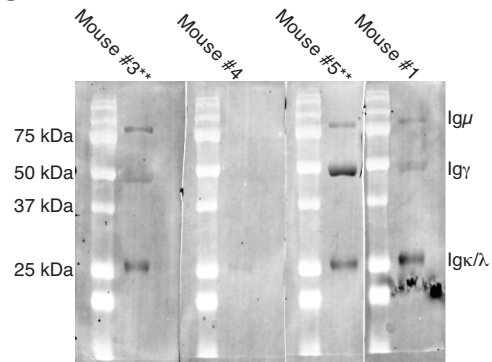

**Supplementary Figure 2.** Antibody response against purified ferret immunoglobulin (A) Immunization scheme for generation of mouse anti-ferret Ig mAb. (B) Serum reactivity of BALB/c mice (n=4) immunized with purified ferret Ig and Imject alum adjuvant was evaluated by ELISA. (C) Serum reactivity against reduced ferret Ig was evaluated by western blot. Molecular markers (Precision Plus Protein™, Bio-Rad, Cat #1610374) and Ig heavy and light chains are indicated. Data in panels B and C are from independent experiments, and were performed once. Asterisks delineate mice used for subsequent B cell hybridoma generation.
